# Supplementary material for: One-Stop Serum Assay Identifies COVID-19 Disease Severity and Vaccination Responses
Source: PubMed Central journal article supplement — Immunohorizons. Author manuscript; Available in PMC 2022 Jun 13. (PMC9190970; doi:10.4049/immunohorizons.2100011), 2021-05-17
Supplement: NIHMS1811198-supplement-Supplement.pdf [file NIHMS1811198-supplement-Supplement.pdf]

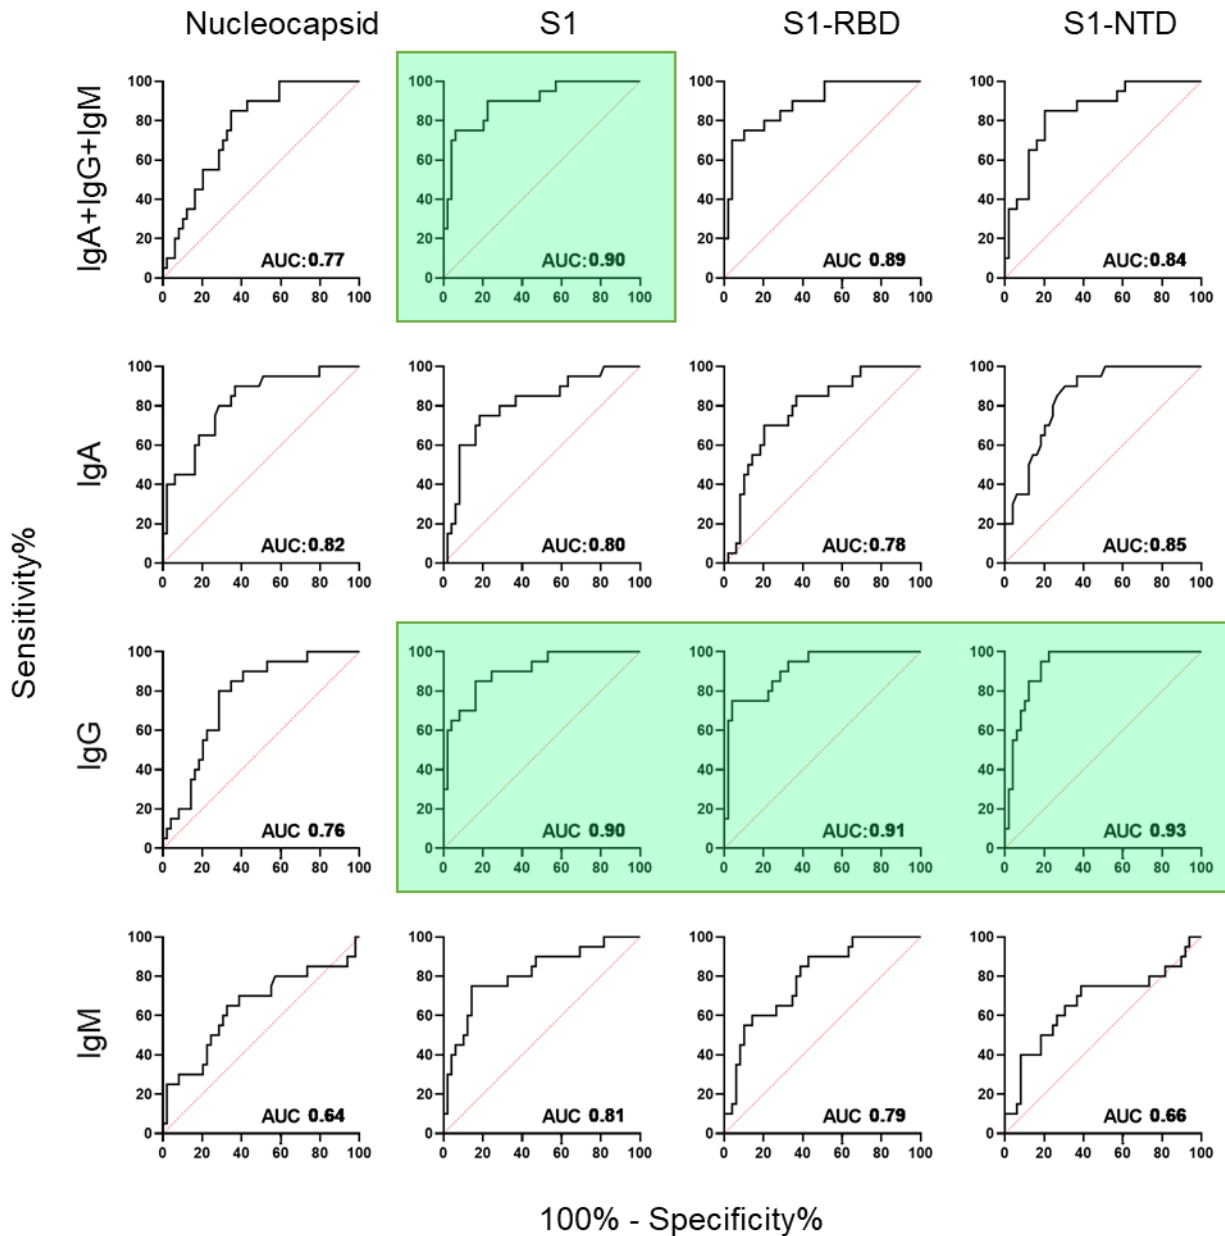

**Figure S1. ROC curves distinguish severe/critical and mild/moderate SARS-CoV-2 infections during convalescence.** ROC curves were used to compare serum anti-SARS-CoV-2 antibody responses between the 20 severe/critical and 49 mild/moderate infected patients (from Fig. 4) during convalescence. Diagonal, dashed, red lines represent the predicted behavior when the test has no diagnostic value. The area-under-the-curve (AUC) measurements provides an index of potential diagnostic utility: AUC near 0.5 suggest no diagnostic value; AUC values near 1.0 indicate strong diagnostic potential. Antigen:isotype combinations that yielded AUC values greater than 0.90 are highlighted in green.

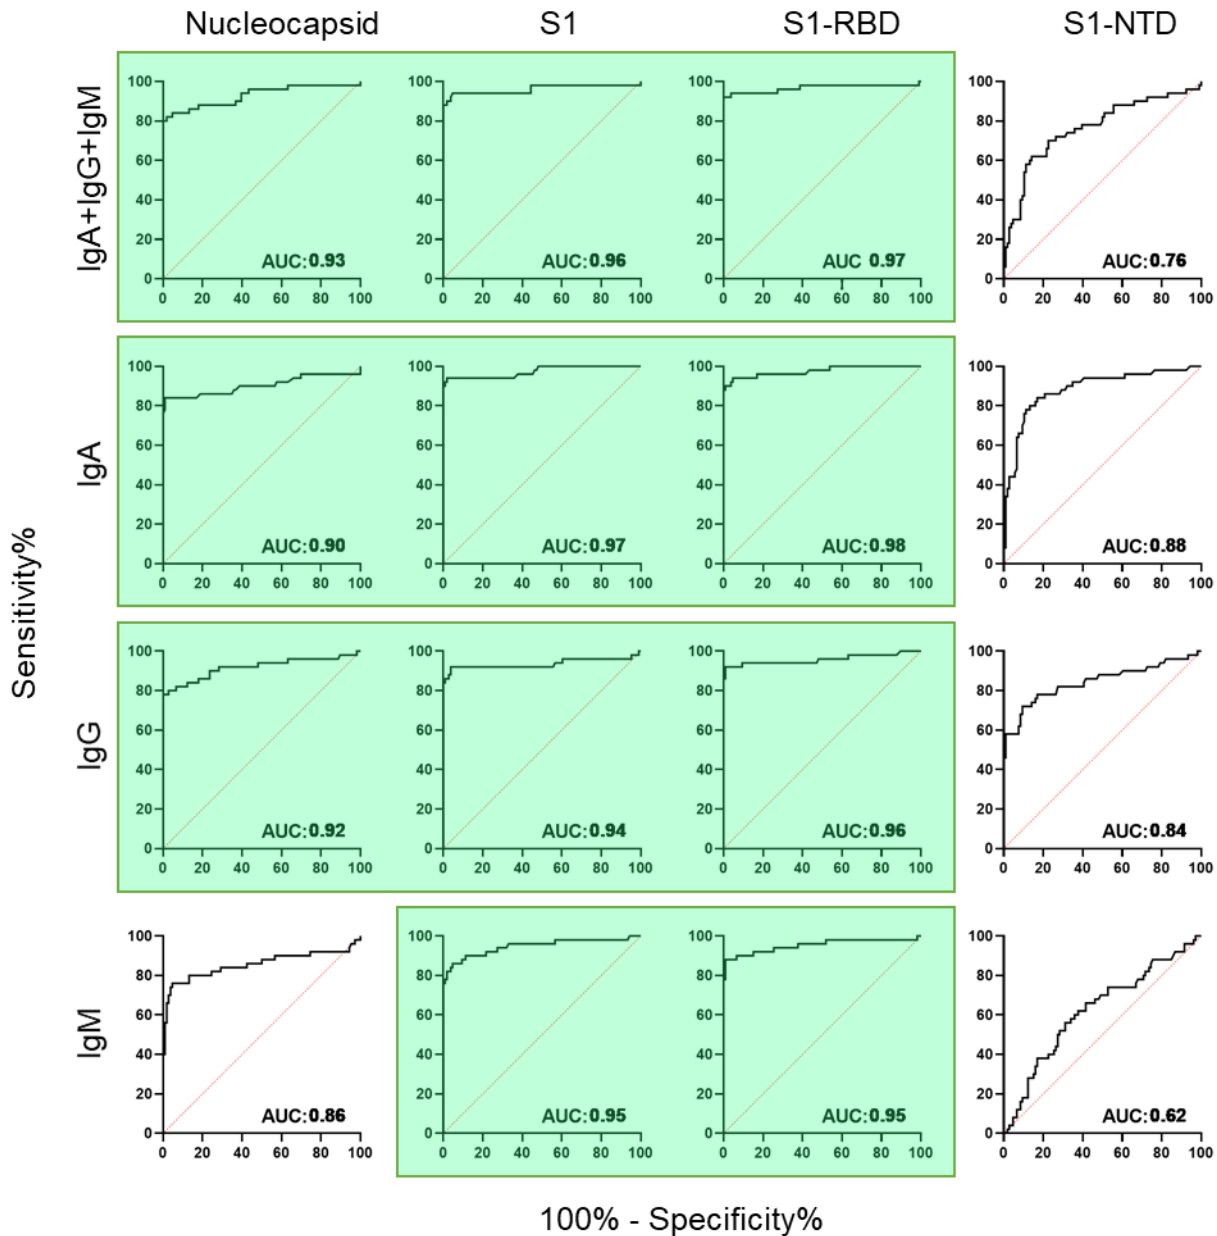

**Figure S2. ROC curves assess diagnostic potential of anti-SARS-CoV-2 antibody levels during acute illness.** ROC curves compare 50 acutely infected SARS-CoV-2 patients (6-30 DPSO) against 106 pre-pandemic controls. Diagonal, dashed, red lines represent the predicted behavior when the test has no diagnostic value. The area-under-the-curve (AUC) measurements provide an index of diagnostic utility where AUC near 0.5 suggest no diagnostic value and AUC near 1.0 indicate strong diagnostic potential. Antigen:isotype combinations that yielded AUC values greater than 0.90 are highlighted in green.

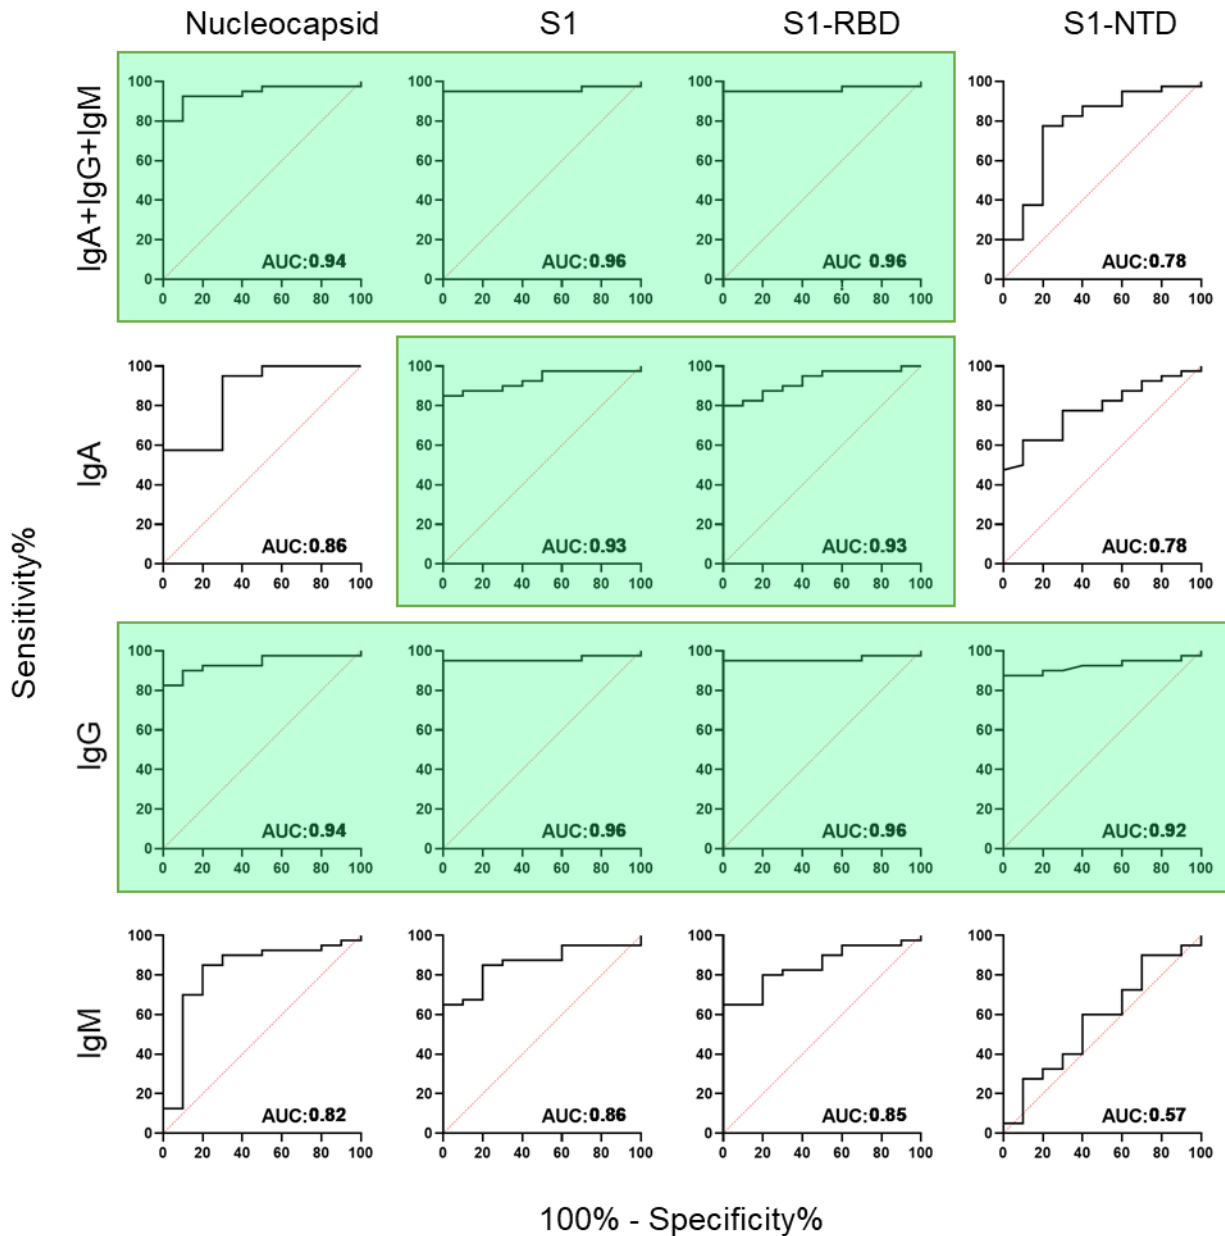

**Figure S3. ROC curves distinguish severe/critical from mild/moderate SARS-CoV-2 infections during acute illness.** Anti-SARS-CoV-2 antibody levels from the 40 severe/critical and 10 mild/moderate patients during acute illness (Fig. 5) were examined using ROC curves. Samples were collected at least 6 DPSO and no more than 30 DPSO. AUC values near 0.5 indicate poor diagnostic potential (diagonal red line); AUC values near 1.0 reflect strong diagnostic value. Antigen:isotype combinations that yielded AUC values greater than 0.90 are highlighted in green.

**Table SI. Antibody levels of severe/critical and mild/moderate SARS-CoV-2 groups converge overtime.**

|     |        | 0-15 DPSO  |            |         | 16-30 DPSO |            |         | 31-60 DPSO |            |         | 61-90 DPSO |           |         | 91-150 DPSO |           |         |
|-----|--------|------------|------------|---------|------------|------------|---------|------------|------------|---------|------------|-----------|---------|-------------|-----------|---------|
|     |        | M/M (N=12) | S/C (N=34) | p-value | M/M (N=6)  | S/C (N=23) | p-value | M/M (N=20) | S/C (N=10) | p-value | M/M (N=21) | S/C (N=9) | p-value | M/M (N=24)  | S/C (N=6) | p-value |
| AGM | N      | 6,141      | 58,375     | <0.0001 | 8,132      | 53,924     | <0.0001 | 13,092     | 34,832     | 0.0057  | 13,092     | 34,832    | 0.0057  | 12,977      | 11,826    | 0.8360  |
|     | S1     | 8,155      | 113,038    | <0.0001 | 9,996      | 156,351    | <0.0001 | 22,534     | 122,593    | 0.0048  | 22,534     | 122,593   | 0.0048  | 24,356      | 26,447    | 0.8581  |
|     | S1-RBD | 24,279     | 173,786    | <0.0001 | 39,308     | 183,484    | <0.0001 | 57,940     | 161,640    | <0.0001 | 57,940     | 161,640   | <0.0001 | 67,462      | 80,962    | 0.5981  |
|     | S1-NTD | 2,024      | 3,956      | 0.0763  | 2,854      | 8,512      | 0.0952  | 1,147      | 21,946     | 0.1307  | 1,147      | 21,946    | 0.1307  | 1,614       | 3,075     | 0.0137  |
| IgA | N      | 951        | 6,780      | 0.0004  | 182        | 4,595      | 0.0007  | 107        | 2,056      | 0.2728  | 107        | 2,056     | 0.2728  | 55          | 85        | 0.0837  |
|     | S1     | 2,920      | 14,867     | 0.0041  | 1,326      | 12,287     | <0.0001 | 630        | 3,423      | 0.0550  | 630        | 3,423     | 0.0550  | 954         | 869       | 0.9083  |
|     | S1-RBD | 8,765      | 30,500     | 0.0247  | 9,099      | 21,472     | 0.1431  | 2,380      | 6,174      | 0.0391  | 2,380      | 6,174     | 0.0391  | 4,781       | 3,541     | 0.6928  |
|     | S1-NTD | 58         | 221        | 0.0007  | 69         | 637        | 0.0400  | 29         | 242        | 0.0799  | 29         | 242       | 0.0799  | 30          | 74        | 0.2372  |
| IgG | N      | 1,943      | 35,424     | <0.0001 | 3,781      | 35,539     | <0.0001 | 9,616      | 23,473     | 0.0112  | 9,616      | 23,473    | 0.0112  | 7,567       | 7,642     | 0.9829  |
|     | S1     | 880        | 66,846     | <0.0001 | 2,845      | 108,589    | <0.0001 | 15,559     | 82,934     | 0.0055  | 15,559     | 82,934    | 0.0055  | 12,788      | 15,663    | 0.6530  |
|     | S1-RBD | 3,595      | 105,489    | <0.0001 | 11,294     | 126,621    | <0.0001 | 36,540     | 112,540    | <0.0001 | 36,540     | 112,540   | <0.0001 | 37,990      | 51,328    | 0.3851  |
|     | S1-NTD | 39         | 1,562      | 0.0001  | 57         | 4,178      | <0.0001 | 263        | 9,842      | 0.2167  | 263        | 9,842     | 0.2167  | 413         | 1,159     | 0.0056  |
| IgM | N      | 1,688      | 5,782      | 0.0322  | 518        | 4,950      | 0.0062  | 676        | 2,179      | 0.3775  | 676        | 2,179     | 0.3775  | 287         | 208       | 0.3288  |
|     | S1     | 2,488      | 15,455     | 0.0007  | 2,128      | 20,111     | 0.0073  | 3,617      | 20,273     | 0.1471  | 3,617      | 20,273    | 0.1471  | 793         | 475       | 0.2090  |
|     | S1-RBD | 7,193      | 37,737     | 0.0001  | 6,921      | 42,051     | 0.0010  | 12,748     | 43,117     | 0.1028  | 12,748     | 43,117    | 0.1028  | 3,693       | 2,291     | 0.1832  |
|     | S1-NTD | 832        | 729        | 0.6769  | 1,160      | 1,470      | 0.6663  | 388        | 4,983      | 0.2677  | 388        | 4,983     | 0.2677  | 356         | 432       | 0.5319  |

Average net MFI was calculated for mild/moderate and severe/critical patients in 15-, 30-, and 60-day intervals over a five-month period post symptom onset. T-tests of significance were performed to compare the two groups at each time interval. Significant differences decreased between the two groups over time.
